# Supplementary material for: Sperm specificity and potential paternal effects in gynogenesis in the Amazon Molly (Poecilia formosa)
Source: PeerJ. 2023 Nov 3;11:e16118. doi: 10.7717/peerj.16118 (PMC10629382; doi:10.7717/peerj.16118)
Supplement: Supplemental Information 1 — Individual data from females in Experiments 1 and 2 with female standard length, number of offspring, number of embryos, relative reproductive output, relative embryo output, and combined relative reproductive output. [file peerj-11-16118-s001.xlsx]

## Sheet: Sheet1
Female Number	Experiment	Population of Female	Species/Population of Male	Date Paired	Date Observed Pregnant	Date Offspring Observed	Number of Offspring	Length	Terminated	Relative reproductive output	Relative embryo output
1	1	VI/17	Poecilia mexicana VI/17 sympatric	2022-03-09	2022-04-25		8 embryos (eyes developed)	3.9 cm	2022-05-16	0	0.205128
2	1	VI/17	Poecilia mexicana VI/17 sympatric	2022-03-09	2022-04-25	2022-05-06	12 offspring/5 large unfertile/10 small unfertile	4.2 cm	2022-05-06	0.285714	0
3	1	VI/17	Poecilia mexicana VI/17 sympatric	2022-03-09	2022-05-02	2022-05-06	14 offspring/6 large unfertile/8 small unfertile	4.3 cm	2022-05-06	0.325581	0
4	1	VI/17	Poecilia mexicana VI/17 sympatric	2022-03-09	2022-05-02		18 embryos/10 small unfertile	4.3 cm	2022-05-16	0	0.418605
5	1	VI/17	Poecilia mexicana VI/17 sympatric	2022-03-09			14 embryos/16 small unfertile	4.1 cm	2022-05-16	0	0.341463
6	1	VI/17	Poecilia mexicana VI/17 sympatric	2022-03-09			16 embryos/5 small unfertile	4.0 cm	2022-05-16	0	0.4
7	1	VI/17	Poecilia mexicana oxolatan allopatric	2022-03-09	2022-04-06	2022-04-08	13 offspring/4 large unfertile/11 small unfertile	4.3 cm	2022-04-08	0.302326	0
8	1	VI/17	Poecilia mexicana oxolatan allopatric	2022-03-09			20 small unfertile	4.1 cm	5/12/2022***	0	0
9	1	VI/17	Poecilia mexicana oxolatan allopatric	2022-03-09			14 small unfertile	4.0 cm	2022-05-12	0	0
10	1	VI/17	Poecilia mexicana oxolatan allopatric	2022-03-09			2 large unfertile/9 small unfertile	3.9 cm	2022-05-12	0	0
11	1	VI/17	Poecilia mexicana oxolatan allopatric	2022-03-09			3 large unfertile/16 small unfertile	4.3 cm	2022-05-16	0	0
12	1	VI/17	Poecilia mexicana oxolatan allopatric	2022-03-09			12 large unfertile/16 small unfertile	4.5 cm	2022-05-16	0	0
13	1	VI/17	Poecilia mexicana VI/17 sympatric	2022-07-21	2022-08-25	2022-08-30	8 offspring/13 large infertile/5 small infertile	3.3 cm	2022-08-31	0.242424	0
14	1	VI/17	Poecilia mexicana VI/17 sympatric	2022-07-21	2021-08-31	2022-09-08	1 offspring/8 embryos (eyes developed, yolk)/13 small unfertile	3.4 cm	2022-09-08	0.0294118	0.235294
15	1	VI/17	Poecilia mexicana VI/17 sympatric	2022-07-21			4 large unfertile/8 small unfertile	3.3 cm	2022-11-03	0	0
16	1	VI/17	Poecilia mexicana VI/17 sympatric	2022-07-21			2 large unfertile/4 small unfertile	3.3 cm	2022-11-03	0	0
17	1	VI/17	Poecilia mexicana VI/17 sympatric	2022-07-21			4 large unfertile/12 small unfertile	3.2 cm	2022-11-03	0	0
18	1	VI/17	Poecilia mexicana VI/17 sympatric	2022-07-21			7 small unfertile	3.3 cm	2022-11-03	0	0
19	1	VI/17	Poecilia mexicana oxolatan allopatric******	2022-07-18	2022-08-25	8/25/2022, 8/29/2022	2+7 offspring/7 large unfertile/2 small unfertile	3.4 cm	2022-08-29	0.0588235	0.205882
20	1	VI/17	Poecilia mexicana oxolatan allopatric	2022-07-18	2022-08-31	2022-09-03	3 offspring/3 large unfertile/8 small unfertile	3.5 cm	2022-09-04	0.0857143	0
21	1	VI/17	Poecilia mexicana oxolatan allopatric	2022-07-18	2022-09-08		3 offspring?/6 small unfertile	3.4 cm	2022-10-31	0.0882353	0
22	1	VI/17	Poecilia mexicana oxolatan allopatric	2022-07-18			6 large unfertile, 8 small unfertile	3.4 cm	2022-10-31	0	0
23	1	VI/17	Poecilia mexicana oxolatan allopatric	2022-07-18			6 large unfertile/4 small unfertile	3.3 cm	2022-10-31	0	0
24	1	VI/17	Poecilia mexicana oxolatan allopatric	2022-07-18			2 large unfertile/3 small unfertile	3.4 cm	2022-10-31	0	0
25	1	AD 21	Poecilia latipinna AD 21	2022-07-21					2022-11-03
26	1	AD 21	Poecilia latipinna AD 21	2022-07-21					2022-11-03
27	1	AD 21	Poecilia latipinna AD 21	2022-07-21					2022-11-03
28	1	AD 21*********	Poecilia latipinna AD 21	2022-07-21					2022-11-03
29	1	AD 21*******	Poecilia latipinna AD 21	2022-07-21					2022-11-03
30	1	AD 21****	Poecilia latipinna AD 21	2022-07-21					2022-11-03
31	1	AD 21	Poecilia latipinna Steve's Ditch********	2022-07-21	9/8/2022, 10/10/22 returned		4 small unfertile	3.4 cm	2022-11-03	0	0
32	1	AD 21	Poecilia latipinna Steve's Ditch	2022-07-21			1 large unfertile/13 small unfertile	3.2 cm	2022-11-03	0	0
33	1	AD 21	Poecilia latipinna Steve's Ditch	2022-07-21			3 embryos (early)/3 large unfertile/12 small unfertile	2.9 cm	2022-11-03	0	0
34	1	AD 21	Poecilia latipinna Steve's Ditch	2022-07-21			7 large unfertile/8 small unfertile	2.7 cm	2022-11-03	0	0
35	1	AD 21	Poecilia latipinna Steve's Ditch	2022-07-21			3 large unfertile/13 small unfertile	2.7 cm	2022-11-03	0	0
36	1	AD 21	Poecilia latipinna Steve's Ditch	2022-07-21			9 small unfertile	2.9 cm	2022-11-03	0	0
37	1	AD 21	Poecilia latipinna AD 21^^^	2022-08-22			3 large unfertile/13 small unfertile	2.8 cm	2022-12-05	0	0
38	1	AD 21	Poecilia latipinna AD 21	2022-08-22			1 large unfertile/10 small unfertile	2.8 cm	2022-12-05	0	0
39	1	AD 21	Poecilia latipinna AD 21	2022-08-22			3 large unfertile	2.8 cm	2022-12-05	0	0
40	1	AD 21	Poecilia latipinna AD 21	2022-08-22			2 large unfertile/11 small unfertile	2.8 cm	2022-12-05	0	0
41	1	AD 21	Poecilia latipinna AD 21	2022-08-22			1 large unfertile/6 small unfertile	2.6 cm	2022-12-05	0	0
42	1	AD 21	Poecilia latipinna AD 21	2022-08-22			1 large unfertile/6 small unfertile	2.7 cm	2022-12-05	0	0
1	2	Wesl	Heterandria formosa	2022-03-07			3 large unfertile/21 small unfertile	2.9 cm	2022-06-02	0	0
2	2	VI/17	Poecilia sphenops Actopan (allopatric)^^^^	3/14/2022**, 7/18/2022			8 small unfertile	3.3 cm	2022-10-31	0	0
3	2	AD 21^^	Xiphophorus hellerii	2022-09-08			3 large unfertile/3 small unfertile	3.2 cm	2022-12-22	0	0
4	2	Wesl	Poecilia sphenops Banos (sympatric)	2022-03-10			3 embryos (eyes developed), 16 small unfertile	3.0 cm	2022-06-02	0	0.1
5	2	Wesl	Limia melanogaster	2022-03-07			5 embryos	2.5 cm	2022-06-02	0	0
6	2	Wesl	Limia melanogaster	2022-03-07		2022-05-20	1 offspring/4 embryos (eyes developed)/11 small unfertile	2.5 cm	2022-05-23	0.04	0.16
7	2	Wesl	Poecilia dominicensis	2022-03-14			6 embryos (eyes developed), 5 small unfertile	3.0 cm	2022-06-06	0	0.2
8	2	Wesl	Gambusia sexradiata	2022-03-07			2 large unfertile/10 small unfertile	2.8 cm	2022-06-02	0	0
9	2	Wesl	Heterandria formosa	2022-03-07			2 large unfertile/7 small unfertile	2.8 cm	2022-06-02	0	0
10	2	Wesl	Gambusia sexradiata	2022-03-07			4 small unfertile	2.9 cm	2022-06-02	0	0
11	2	VI/17	Xiphophorus hellerii	2022-03-07			11 embryos/3 small unfertile	4.0 cm	2022-06-02	0	0
12	2	VI/17	Poecilia sphenops Actopan (allopatric)	2022-03-14		2022-06-06	5 offspring/6 small unfertile*****	3.2 cm	2022-06-06	0.15625	0
13	2	AD 21	Gambusia affinis	2022-07-18			2 large unfertile/20 small unfertile	2.4 cm	2022-10-31	0	0
14	2	AD 21	Poecilia dominicensis	2022-07-18			10 small unfertile	2.4 cm	2022-10-31	0	0
15	2	AD 21	Poecilia sphenops Banos (sympatric)	2022-07-18		2022-10-17	6 offspring/7 large unfertile/10 small unfertile	2.9 cm	2022-10-17	0	0
16	2	AD 21	Gambusia affinis	2022-07-18			4 large unfertile/8 small unfertile	2.4 cm	2022-10-31	0	0
17	2	AD 21	Xiphophorus variatus	2022-07-21			1 large unfertile/6 small unfertile	2.7 cm	2022-11-03	0	0
18	2	AD 21	Xiphophorus variatus	2022-07-21			3 large unfertile/8 small unfertile	2.4 cm	2022-11-03	0	0
19	2	AD 21^	Poeciliopsis prolifica	2022-09-01			6 small unfertile	3.1 cm	2022-12-15	0	0
20	2	AD 21	Poeciliopsis prolifica	2022-07-28			5 embryos/12 small unfertile	2.8 cm	2022-11-10	0	0
21	2	AD 21	Girardinus metallicus*	2022-07-28			2 large unfertile/10 small unfertile	2.5 cm	2022-11-10	0	0
22	2	AD 21	Girardinus metallicus	2022-07-28			3 embryos/8 small unfertile	2.6 cm	2022-11-10	0	0
23	2	VI/17	Limia islai	2022-08-04		2022-09-15	5 offspring/3 large unfertile/8 small unfertile	3.2 cm	2022-09-15	0.15625	0
24	2	VI/17	Limia islai^^^^^	2022-08-04			6 large unfertile/7 small unfertile	2.7 cm	2022-11-17	0	0
3	Follow-up	VI/17	Poecilia wingei	2023-02-06			19 large infertile/11 small infertile	3.8 cm	2023-05-25	0	0
5	Follow-up	VI/17	Poecilia wingei	2023-02-06			16 large infertile/10 small infertile	3.8 cm	2023-05-25	0	0
*male died between 7/28 and 8/4, replaced with new male 8/4, another 1/2 males found dead between 8/22 and 8/25, replaced with new male 8/30
**female missing between 4/28 and 5/2, later found dead from jumping
*** found dead, 1-9 and 1-10 found moribund and euthanized. Necropsy showed scale sloughing, diffuse petechiation of internal organs, and friable gastrointestinal tract with green discoloration of proximal intestine. R/O Aeromonas hydrophila secondary to plant and snail death in tank
**** Found dead between 7/28 and 8/4, replaced with new female 8/4
*****3 surviving offspring at 2 week check
******1 of the two males found dead between 7/28 and 8/4, replaced 8/4 with one of the males used previously, swapped for new male on 8/11
*******Found dead between 8/4 and 8/11, replaced with new female 8/11
********One of two males found dead between 8/4 and 8/11, replaced 8/12 with new male. Another male was missing between 9/11 and 9/15.
*********Another female was dead on 8/24. Decided to restart the tank with same males but using new females.
^Found dead 8/31. Replaced with a P. formosa Genome 9/1/22.
^^Found dead on 9/6/2022. Replaced with P. formosa Genome 9/8/2022.
^^^P. latipinna AD 21 male found dead 9/19 and replaced 9/26. 1 AD 21 male found dead 10/13 and replaced 10/13 with AD 22 male. 1 AD 21 male found dead 11/9 and replaced with AD22 male on 11/17. 1 AD 22 male euthanized 11/13/22 for lethargy and dyspnea and replaced with AD 21 male on 11/13. AD 21 male found dead on 12/1 and replaced with AD 22 male on 12/1.
^^^^Male died between 10/12-10/13. New male paired 10/13/2022.
^^^^^L. islai male dead 10/28/22. New L. islai male (A. cruz) added 10/28/22 and swapped for male with intact gonopore that week.
