# Supplementary material for: Sperm specificity and potential paternal effects in gynogenesis in the Amazon Molly (Poecilia formosa)
Source: PeerJ. 2023 Nov 3;11:e16118. doi: 10.7717/peerj.16118 (PMC10629382; doi:10.7717/peerj.16118)
Supplement: Supplemental Information 2 — Geographic location of origin for populations of Poecilia formosa, Poecilia mexicana, and Poecilia latipinna used. [file peerj-11-16118-s002.xlsx]

## Sheet: Sheet1
Population	Location	Coordinates
VI/17	Rio Purificacion, Tamaulipas, Mexico	24.0423419018476, -98.9035613191428
AD21	Airport Ditch, Brownsville	25.93 N, 97.48 W
Wesl	Weslaco, Texas	26°7′14.52 N, 97°57′41.44 W
Oxolotan	Rio Oxolotan, Tabasco, Mexico	17.4458190588613, -92.7636455280522
Steve's Ditch	Wakulla County Florida	29°58.379' N, 84°23.357’ W
